# Supplementary material for: Characterizing Macrophages Diversity in COVID-19 Patients Using Deep Learning
Source: MDPI journal article supplement (doi:10.3390/genes13122264), 2022-12-01
Supplement: s1 [file s1]

**Table S1. Gene markers for cell type identification**

| Cell type                      | Marker                                                                                                                                                                                                                                                                                                                                                                                                                                                                                                                                                                                                                                                                                                                                                                                                                                                   |
|--------------------------------|----------------------------------------------------------------------------------------------------------------------------------------------------------------------------------------------------------------------------------------------------------------------------------------------------------------------------------------------------------------------------------------------------------------------------------------------------------------------------------------------------------------------------------------------------------------------------------------------------------------------------------------------------------------------------------------------------------------------------------------------------------------------------------------------------------------------------------------------------------|
| Anterior foregut endoderm cell | CXCR4, EPCAM, SOX2                                                                                                                                                                                                                                                                                                                                                                                                                                                                                                                                                                                                                                                                                                                                                                                                                                       |
| B cell                         | BANK1, BCL11A, BLK, CD19, MS4A1                                                                                                                                                                                                                                                                                                                                                                                                                                                                                                                                                                                                                                                                                                                                                                                                                          |
| Basal cell                     | ADH7, AQP3, CAV1, CCND2, CLCA2, CLCA4, CLDN1, COL17A1, CSTA, DSG3, FABP5, FGFBP1, GPNMB, GPX2, HSPB1, IGFBP6, IL1RN, JUP, KRT13, KRT14, KRT15, KRT16, KRT17, KRT4, KRT5, KRT6A, KRT6B, LAD1, LGALS7, LGALS7B, LY6D, MT1X, NRARP, PLAT, PTTG1, S100A10, S100A14, S100A16, S100A2, S100A8, SDC1, SERPINB13, SERPINB2, SERPINB5, SFN, SPINK5, SPRR1A, SPRR1B, THBD, TIMP1                                                                                                                                                                                                                                                                                                                                                                                                                                                                                   |
| CD4+ T cell                    | CD3D, CD3E, CD3G, IL7R, TRAC                                                                                                                                                                                                                                                                                                                                                                                                                                                                                                                                                                                                                                                                                                                                                                                                                             |
| CD8+ T cell                    | CD3D, CD3E, CD3G, CD8A, CD8B, FYN, GZMA, TRAC                                                                                                                                                                                                                                                                                                                                                                                                                                                                                                                                                                                                                                                                                                                                                                                                            |
| Ciliated cell                  | AGR3, AKAP14, ALDH3A1, ANKRD37, ANKRD66, APOBEC4, ATF3, BASP1, BBOF1, C11orf97, C12orf75, C20orf85, C5orf49, C9orf24, CABCO1, CAP5, CAPSL, CCDC170, CCDC33, CCDC65, CCDC74B, CCDC81, CCL15, CDHR3, CETN2, CFAP126, CFAP299, CFAP52, CFAP53, CFAP73, CFAP77, CKB, CRIP1, CST6, CTXN1, CYP4B1, DAW1, DMKN, DNAAF3, DNAH12, DNAH7, DRC1, DYNLRB2, EFCAB10, ENKUR, ERICH3, EZR, FAM166B, FAM183A, FAM216B, FAM229B, FAM81B, FXYD3, GPR162, HBB, HSP90AA1, HYDIN, IFI27, IFT57, IGFBP7, KIF9, LRRC10B, LRRC23, LRRC46, LRRIQ1, METTL27, MIA, MORN2, MORN5, NME5, NQO1, PACRG, PIFO, PLAC8, PPIL6, PRDX5, PSCA, RBKS, RIIAD1, ROPN1L, RP1, RRAD, RSPH1, RSPH4A, SAA2, SAA2-SAA4, SAXO2, SCGB2A1, SMIM22, SNTN, SPA17, SPACA9, SPAG6, STMND1, STOML3, TEKT1, TMEM190, TMEM231, TPPP3, TSPAN1, TSPAN19, TUBA1A, TUBA4B, TUBB4B, VIM, VWA3B, WDR38, WDR54, ZDHHC1 |
| Dendritic cell                 | CCR6, CCL20, CD1A, CD83, CLEC4C, THBD                                                                                                                                                                                                                                                                                                                                                                                                                                                                                                                                                                                                                                                                                                                                                                                                                    |
| Epithelial progenitor cell     | CEACAM6                                                                                                                                                                                                                                                                                                                                                                                                                                                                                                                                                                                                                                                                                                                                                                                                                                                  |
| Fibroblast                     | CD36, FN1, VIM                                                                                                                                                                                                                                                                                                                                                                                                                                                                                                                                                                                                                                                                                                                                                                                                                                           |
| M1 macrophage                  | CXCL10                                                                                                                                                                                                                                                                                                                                                                                                                                                                                                                                                                                                                                                                                                                                                                                                                                                   |
| M2 macrophage                  | CCL18, CD163                                                                                                                                                                                                                                                                                                                                                                                                                                                                                                                                                                                                                                                                                                                                                                                                                                             |
| Macrophage                     | C1QA, CCL18, CCL2, CD14, CD163, CD83, CTSB, CXCL9, ICAM1, IL1RN, MRC1, MS4A6A, MSR1, TFRC                                                                                                                                                                                                                                                                                                                                                                                                                                                                                                                                                                                                                                                                                                                                                                |
| Monocyte                       | CD14, CD36, MRC1                                                                                                                                                                                                                                                                                                                                                                                                                                                                                                                                                                                                                                                                                                                                                                                                                                         |
| Plasma cell                    | CD19, CD27, CD38, CD79A, IGHA1, IGHG1, IGHG4, IGHM, IGKC, JCHAIN, MZB1, SDC1, SLAMF7, XBP1                                                                                                                                                                                                                                                                                                                                                                                                                                                                                                                                                                                                                                                                                                                                                               |
| Secretory cell                 | ALDH1A3, ALDH1A1, BPIFB1, C3, CD74, CEACAM6, CP, CREB3L1, CXCL1, CXCL2, CXCL6, CXCL8, GABRP, HLA-DPA1, HLA-DPB1, HLA-DQA1, HLA-DQA2, HLA-DQB1, HLA-DRA, HLA-DRB1, HLA-DRB5, IFITM1, IFITM3, KRT18, LYPD2, MET, MSMB, MUC5B, NCCRP1, PDZK1IP1, PI3, PIGR, PLK2, PRSS23, RARRES1, SCGB1A1, SCGB3A1, SLC34A2, SLC6A14, SLPI, STEAP4, UBD, VMO1, XBP1, ZG16B                                                                                                                                                                                                                                                                                                                                                                                                                                                                                                 |
| T cell                         | CD3D, CD3E, CD3G, CD8A                                                                                                                                                                                                                                                                                                                                                                                                                                                                                                                                                                                                                                                                                                                                                                                                                                   |
| Type I pneumocyte              | AQP5, CAV1, CD55, EMP2, HOPX, LMO7, PDPN, RTKN2, S100A14, S100A6                                                                                                                                                                                                                                                                                                                                                                                                                                                                                                                                                                                                                                                                                                                                                                                         |
| Type II pneumocyte             | LAMP3, NAPSA, PGC, SFTPA1, SFTPA2, SFTPC, SLC34A2                                                                                                                                                                                                                                                                                                                                                                                                                                                                                                                                                                                                                                                                                                                                                                                                        |
| mDC                            | CD1C                                                                                                                                                                                                                                                                                                                                                                                                                                                                                                                                                                                                                                                                                                                                                                                                                                                     |

**Table S2. Up-regulated differentially expressed genes of M1 in Cluster 0 compared to M1 in clusters 15, 18, and 27.**

| Gene     | avg_log2FC | pct.1 | pct.2 | p_val_adj | FC         |
|----------|------------|-------|-------|-----------|------------|
| S100A8   | 3.91408514 | 0.997 | 0.659 | 1.10E-300 | 15.07499   |
| S100A9   | 3.84128293 | 0.997 | 0.68  | 1.10E-300 | 14.3331413 |
| CCL2     | 3.22920882 | 0.991 | 0.78  | 1.10E-300 | 9.3775355  |
| CXCL10   | 3.05277233 | 0.976 | 0.71  | 1.10E-300 | 8.29804988 |
| IL1RN    | 3.01170305 | 0.994 | 0.677 | 1.10E-300 | 8.0651594  |
| APOBEC3A | 3.00875985 | 0.985 | 0.579 | 1.10E-300 | 8.04872271 |
| CCL8     | 2.72228492 | 0.842 | 0.653 | 1.10E-300 | 6.59917154 |
| S100A12  | 2.42080534 | 0.892 | 0.574 | 1.10E-300 | 5.35469847 |
| BCL2A1   | 2.39656459 | 0.994 | 0.64  | 1.10E-300 | 5.26547833 |
| CCL3L1   | 2.29993903 | 0.927 | 0.701 | 1.10E-300 | 4.92436953 |
| CCL7     | 2.28379316 | 0.839 | 0.551 | 1.10E-300 | 4.86956588 |
| CTSL     | 2.26067825 | 0.996 | 0.716 | 1.10E-300 | 4.79216721 |
| SAT1     | 2.24436293 | 1     | 0.955 | 1.10E-300 | 4.73827827 |
| C15orf48 | 2.23965554 | 0.948 | 0.655 | 1.10E-300 | 4.72284288 |
| TIMP1    | 2.22126941 | 0.962 | 0.64  | 1.10E-300 | 4.66303549 |
| FCN1     | 2.20004179 | 0.968 | 0.544 | 1.10E-300 | 4.5949265  |
| GLUL     | 2.19480796 | 0.995 | 0.714 | 1.10E-300 | 4.57828718 |
| LYZ      | 2.18038283 | 0.972 | 0.578 | 1.10E-300 | 4.53273819 |
| CTSB     | 2.15890226 | 0.998 | 0.812 | 1.10E-300 | 4.46574929 |
| MAFB     | 2.14374373 | 0.955 | 0.556 | 1.10E-300 | 4.41907291 |
| TYMP     | 2.13641564 | 1     | 0.889 | 1.10E-300 | 4.39668339 |
| FTH1     | 2.08413573 | 1     | 1     | 1.10E-300 | 4.24021003 |
| CXCL11   | 2.07603785 | 0.838 | 0.516 | 1.10E-300 | 4.21647632 |
| SOD2     | 2.01597418 | 0.978 | 0.711 | 1.10E-300 | 4.04453595 |
| NCF1     | 2.01178917 | 0.963 | 0.665 | 1.10E-300 | 4.03282045 |
| IDO1     | 2.00313336 | 0.911 | 0.613 | 1.10E-300 | 4.00869696 |
| FTL      | 1.99677537 | 1     | 0.997 | 1.10E-300 | 3.99106942 |
| IFIT2    | 1.98908774 | 0.988 | 0.781 | 1.10E-300 | 3.96985892 |
| RSAD2    | 1.98578773 | 0.994 | 0.853 | 1.10E-300 | 3.96078869 |
| SGK1     | 1.98233789 | 0.951 | 0.586 | 1.10E-300 | 3.95132876 |
| PLEK     | 1.97058698 | 0.983 | 0.651 | 1.10E-300 | 3.91927548 |
| CST3     | 1.85562764 | 0.994 | 0.68  | 1.10E-300 | 3.61909164 |
| IFITM3   | 1.8531196  | 1     | 0.963 | 1.10E-300 | 3.61280552 |
| NAMPT    | 1.82646248 | 0.982 | 0.706 | 1.10E-300 | 3.54666355 |
| PLAUR    | 1.75156248 | 0.952 | 0.579 | 1.10E-300 | 3.36723049 |
| DUSP6    | 1.74805872 | 0.925 | 0.556 | 1.10E-300 | 3.35906268 |
| IFIT1    | 1.71695842 | 0.978 | 0.802 | 1.10E-300 | 3.28742601 |
| DEFB1    | 1.7122345  | 0.836 | 0.442 | 1.10E-300 | 3.27667936 |
| S100A6   | 1.70540356 | 1     | 0.979 | 1.10E-300 | 3.26120145 |
| WARS     | 1.69013143 | 0.976 | 0.767 | 1.10E-300 | 3.22686098 |
| TYROBP   | 1.66488032 | 1     | 0.846 | 1.10E-300 | 3.17087349 |

|       |            |       |       |           |            |
|-------|------------|-------|-------|-----------|------------|
| IFIT3 | 1.64195451 | 0.997 | 0.881 | 1.10E-300 | 3.12088351 |
| IFI30 | 1.6134169  | 0.954 | 0.574 | 1.10E-300 | 3.05975661 |
| VAMP5 | 1.6122559  | 0.986 | 0.814 | 1.10E-300 | 3.05729529 |
| NINJ1 | 1.60489932 | 0.931 | 0.63  | 1.10E-300 | 3.04174522 |
| ISG15 | 1.58979949 | 1     | 0.995 | 1.10E-300 | 3.01007511 |
| CCL3  | 1.57183572 | 0.971 | 0.81  | 1.10E-300 | 2.97282743 |
| GBP1  | 1.56265881 | 0.997 | 0.889 | 1.10E-300 | 2.95397743 |
| CD14  | 1.51317098 | 0.842 | 0.421 | 1.10E-300 | 2.85436728 |

**Table S3. Gene ontology terms of up regulated genes of M1 cluster 0 (Genes on Table S2).**

| GO Term                          | Genes                                                                                                                                                                 | P-value  |
|----------------------------------|-----------------------------------------------------------------------------------------------------------------------------------------------------------------------|----------|
| GO:0006935-Chemotaxis            | CCL2, CCL3L1, CCL3, CCL7, CCL8, CXCL10, CXCL11, CXCL8, S100A8, S100A9, FPR1, TYMP                                                                                     | 4.30E-12 |
| GO:0006954-Inflammatory response | CCL2, CCL3, CCL7, CCL8, CXCL10, CXCL11, CXCL8, CD14, CD163, S100A12, S100A8, S100A9, GBP5, NINJ1                                                                      | 1.10E-11 |
| GO:0002376-Immunity              | CD14, CD300E, IFI30, ISG15, S100A12, S100A8, S100A9, APOBEC3A, CLU, FCN1, GBP1, GBP5, IDO1, IFI27, IFIT1, IFIT2, IFIT3, IFITM3, IL4I1, LILRA5, HLA-DRA, RSAD2, TYROBP | 4.70E-10 |
| GO:0045087-Innate immunity       | CD14, ISG15, S100A12, S100A8, S100A9, APOBEC3A, CLU, FCN1, IFI27, IFIT1, IFIT2, IFIT3, IFITM3, LILRA5, RSAD2                                                          | 1.10E-08 |
| GO:0051607-Antiviral defense     | ISG15, APOBEC3A, GBP1, IFI27, IFIT1, IFIT2, IFIT3, IFITM3, RSAD2                                                                                                      | 5.40E-07 |
| GO:0006915-Apoptosis             | BCL2A1, S100A8, S100A9, TNFSF10, CLU, IFI27, IFIT2, SRGN, SGK1                                                                                                        | 7.90E-03 |

**Table S4. Down-regulated differentially expressed genes of M1 in Cluster 0 compared to M1 in clusters 15, 18, and 27.**

| Gene     | avg_log2FC | pct.1 | pct.2 | p_val_adj | FC       |
|----------|------------|-------|-------|-----------|----------|
| GNLY     | -4.8889    | 0.408 | 0.778 | 1.10E-300 | 0.033752 |
| GZMB     | -4.11407   | 0.441 | 0.852 | 1.10E-300 | 0.057749 |
| CCL5     | -3.47572   | 0.412 | 0.891 | 1.10E-300 | 0.089889 |
| NKG7     | -3.28169   | 0.461 | 0.875 | 1.10E-300 | 0.102828 |
| IL32     | -3.1459    | 0.434 | 0.89  | 1.10E-300 | 0.112977 |
| GZMA     | -2.9777    | 0.403 | 0.89  | 1.10E-300 | 0.126947 |
| CD7      | -2.46053   | 0.38  | 0.884 | 1.10E-300 | 0.18168  |
| STMN1    | -2.32011   | 0.291 | 0.832 | 1.10E-300 | 0.200253 |
| PRF1     | -2.29382   | 0.276 | 0.829 | 1.10E-300 | 0.203935 |
| HMGB2    | -2.09781   | 0.379 | 0.811 | 1.10E-300 | 0.233613 |
| CD2      | -1.94554   | 0.419 | 0.88  | 1.10E-300 | 0.259618 |
| CTSW     | -1.86637   | 0.388 | 0.775 | 1.10E-300 | 0.274263 |
| RPS27    | -1.81042   | 0.996 | 1     | 1.10E-300 | 0.285109 |
| RPS19    | -1.7425    | 0.991 | 1     | 1.10E-300 | 0.298851 |
| RAC2     | -1.66309   | 0.653 | 0.959 | 1.10E-300 | 0.315762 |
| RPL41    | -1.64061   | 1     | 1     | 1.10E-300 | 0.32072  |
| CST7     | -1.57656   | 0.469 | 0.805 | 1.10E-300 | 0.335281 |
| CORO1A   | -1.5726    | 0.709 | 0.928 | 1.10E-300 | 0.336203 |
| CD3E     | -1.56684   | 0.439 | 0.755 | 1.10E-300 | 0.337546 |
| KLRD1    | -1.55706   | 0.275 | 0.702 | 1.10E-300 | 0.339843 |
| LIMD2    | -1.39869   | 0.393 | 0.862 | 1.10E-300 | 0.379274 |
| LAG3     | -1.3984    | 0.448 | 0.806 | 1.10E-300 | 0.37935  |
| PTPRCAP  | -1.37514   | 0.298 | 0.861 | 1.10E-300 | 0.385515 |
| TYMS     | -1.37205   | 0.282 | 0.779 | 1.10E-300 | 0.386343 |
| KLRC1    | -1.35196   | 0.396 | 0.666 | 1.10E-300 | 0.391759 |
| RPL34    | -1.34192   | 0.983 | 1     | 1.10E-300 | 0.394494 |
| C12orf75 | -1.29769   | 0.353 | 0.763 | 1.10E-300 | 0.406777 |
| RPL13A   | -1.26885   | 0.768 | 0.981 | 1.10E-300 | 0.41499  |
| RPL21    | -1.24814   | 0.918 | 0.997 | 1.10E-300 | 0.42099  |
| CD3D     | -1.23247   | 0.319 | 0.682 | 1.10E-300 | 0.425589 |
| CD52     | -1.21734   | 0.771 | 0.931 | 1.10E-300 | 0.430075 |
| LTB      | -1.21637   | 0.416 | 0.711 | 1.10E-300 | 0.430363 |
| CD247    | -1.21267   | 0.44  | 0.834 | 1.10E-300 | 0.43147  |
| ALOX5AP  | -1.20627   | 0.469 | 0.833 | 1.10E-300 | 0.433389 |
| TMSB4X   | -1.19248   | 0.999 | 1     | 1.10E-300 | 0.43755  |
| ZFP36L2  | -1.18298   | 0.397 | 0.857 | 1.10E-300 | 0.44044  |
| XCL1     | -1.18291   | 0.431 | 0.603 | 1.10E-300 | 0.440462 |
| TRBC2    | -1.17556   | 0.321 | 0.791 | 1.10E-300 | 0.442712 |
| MT-ND4L  | -1.14999   | 0.972 | 0.996 | 1.10E-300 | 0.450629 |

|        |          |       |       |           |          |
|--------|----------|-------|-------|-----------|----------|
| STK17A | -1.14328 | 0.529 | 0.872 | 1.10E-300 | 0.452728 |
| IL2RB  | -1.1269  | 0.407 | 0.79  | 1.10E-300 | 0.457899 |
| UBE2C  | -1.10553 | 0.409 | 0.74  | 1.10E-300 | 0.464731 |
| HOPX   | -1.10021 | 0.327 | 0.694 | 1.10E-300 | 0.466449 |
| LCK    | -1.09124 | 0.451 | 0.739 | 1.10E-300 | 0.469359 |
| RGS1   | -1.08452 | 0.208 | 0.765 | 1.10E-300 | 0.471549 |
| GIMAP7 | -1.07559 | 0.542 | 0.825 | 1.10E-300 | 0.474478 |
| GZMH   | -1.05476 | 0.311 | 0.646 | 1.10E-300 | 0.481379 |
| TRDC   | -1.05    | 0.283 | 0.69  | 1.10E-300 | 0.482969 |
| MKI67  | -1.03331 | 0.382 | 0.764 | 1.10E-300 | 0.488588 |
| SH2D2A | -1.00928 | 0.393 | 0.785 | 1.10E-300 | 0.496793 |
| CD96   | -1.00509 | 0.457 | 0.779 | 1.10E-300 | 0.49824  |

**Table S5. Gene ontology terms of down regulated genes of M1 cluster 0 (Genes on Table S4).**

| GO Term                             | Genes                                                                                                                                                                 | P-value |
|-------------------------------------|-----------------------------------------------------------------------------------------------------------------------------------------------------------------------|---------|
| GO:0019835-Cytolysis                | GZMA, GZMB, GZMH, NKG7, PRF1                                                                                                                                          | 1.1E-7  |
| GO:0002250-Adaptive Immune response | CD247, CD3D, CD3E, CD7, TRBC2, TRDC, KLRC1, KLRD1, LAG3                                                                                                               | 3.8E-5  |
| GO:0002376-Immunity                 | CD14, CD300E, IFI30, ISG15, S100A12, S100A8, S100A9, APOBEC3A, CLU, FCN1, GBP1, GBP5, IDO1, IFI27, IFIT1, IFIT2, IFIT3, IFITM3, IL4I1, LILRA5, HLA-DRA, RSAD2, TYROBP | 5.4E-4  |
| GO:0005840-Ribosomal protein        | RPL13A, RPL21, RPL34, RPL41, RPS19, RPS27                                                                                                                             | 6.6E-3  |

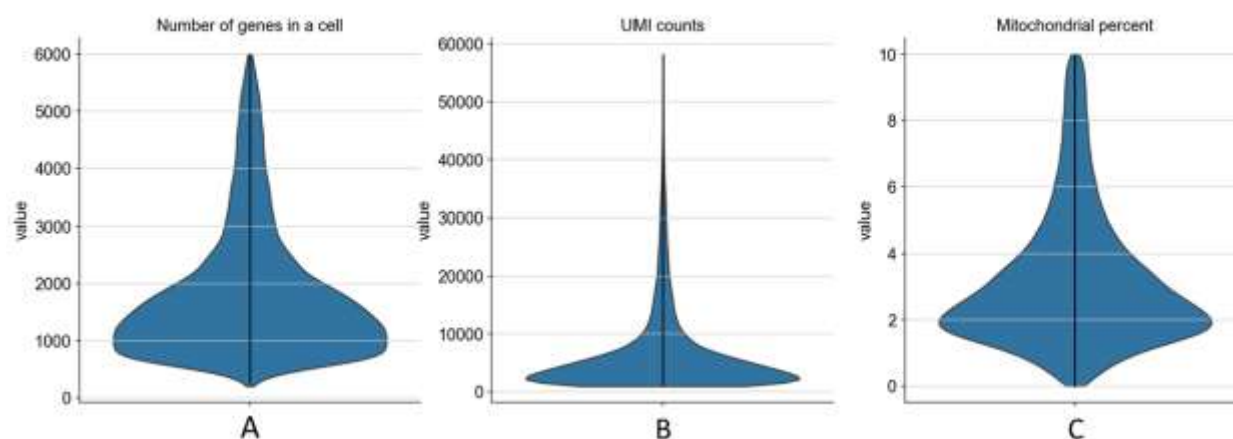

**Figure S1. Quality control.** Violin plot for 63,734 cells after applying three filters with three criteria: 1) the number of genes in a cell should stay between 200 and 6,000, UMI counts greater than or equal to 1,000, and percentage of mitochondrial less than or equal to 0.1. (A) Violin plot of the number of genes detected in cells after filtering; (B) Violin plot of the UMI counts in cells after filtering; (C) Violin plot of the percentage of mitochondrial in cells after filtering.

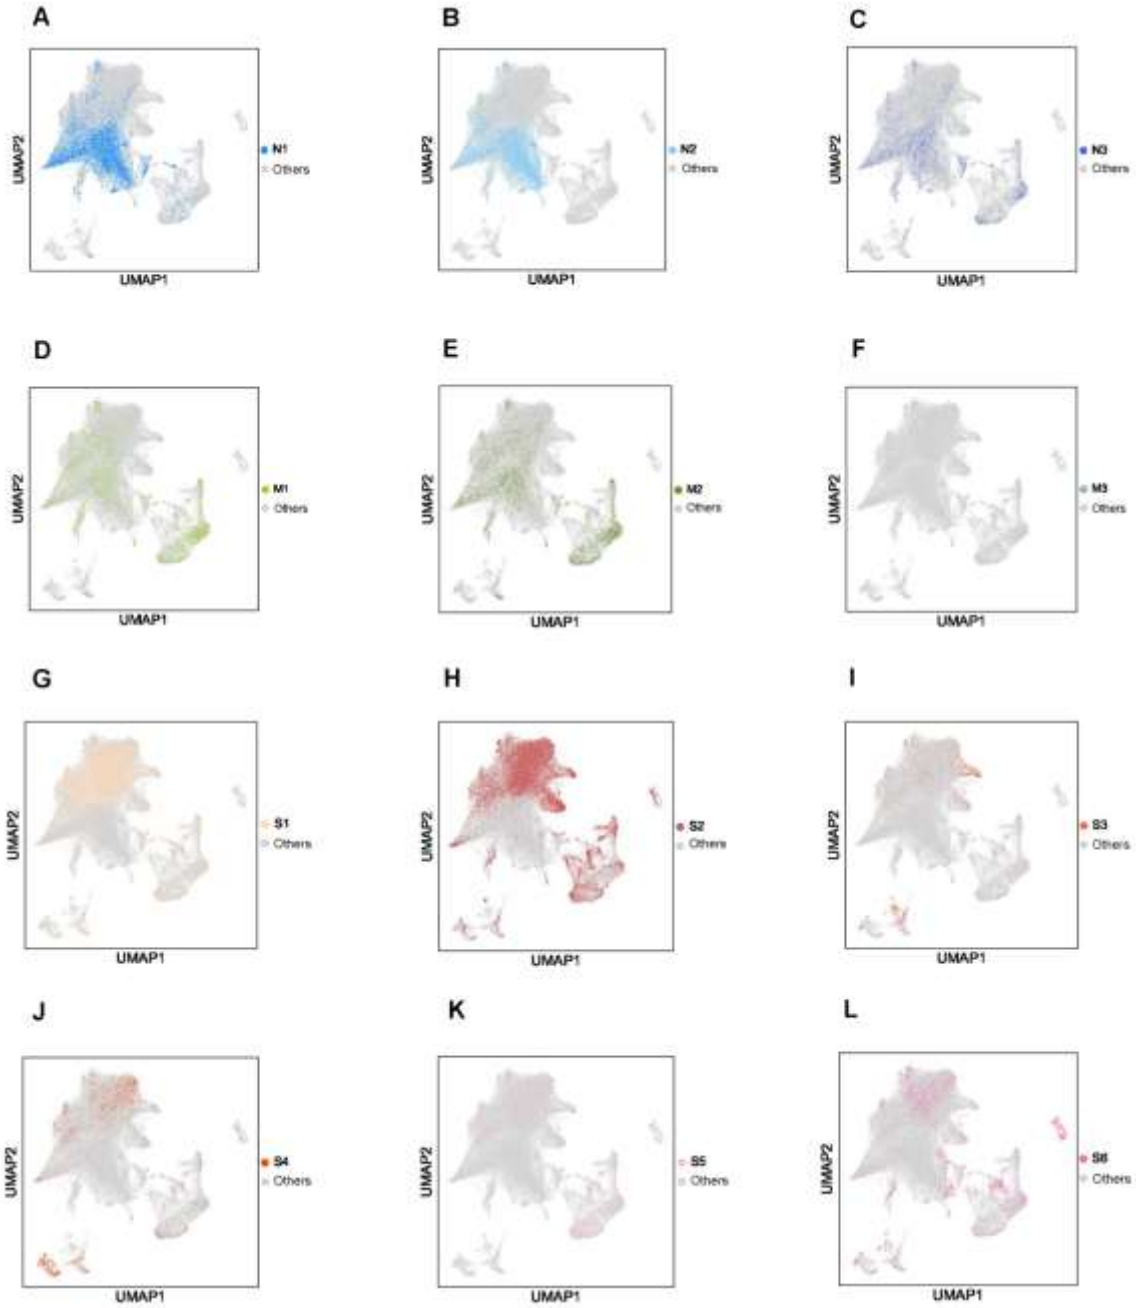

**Figure S2. UMAP of cells by patient.** A-C showing the UMAP of the cells belonging to Normal patients. D-F the UMAP of cells belonging to Mild patients. G-L The UMAP of cells belonging to Severe patients. Gray color shows the cells that belong to the rest of the patients.
